# Supplementary material for: Insulin-producing organoids engineered from islet and amniotic epithelial cells to treat diabetes
Source: PubMed Central journal article supplement (PMC6776618; doi:10.1038/s41467-019-12472-3), 2019-10-03
Supplement: 41467_2019_12472_MOESM1_ESM.pdf [file 41467_2019_12472_MOESM1_ESM.pdf]

Supplementary information

“Insulin-producing organoids engineered from islet- and amniotic epithelial cells to treat diabetes”

Lebreton et al.

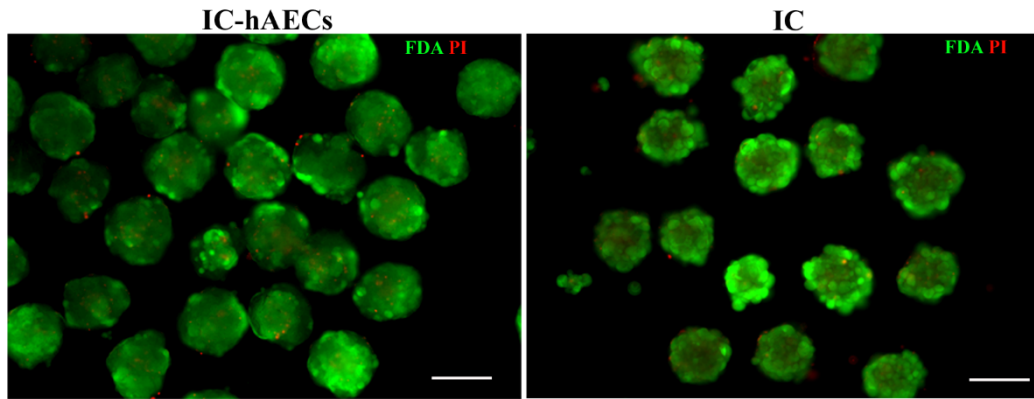

Supplementary Figure 1. Immunofluorescence of IC spheroids and IC-hAEC organoids assessed for viability by FDA/PI test; green (FDI) and red (PI) signals indicate live and dead cells respectively. Scale bars: 100  $\mu$ m.

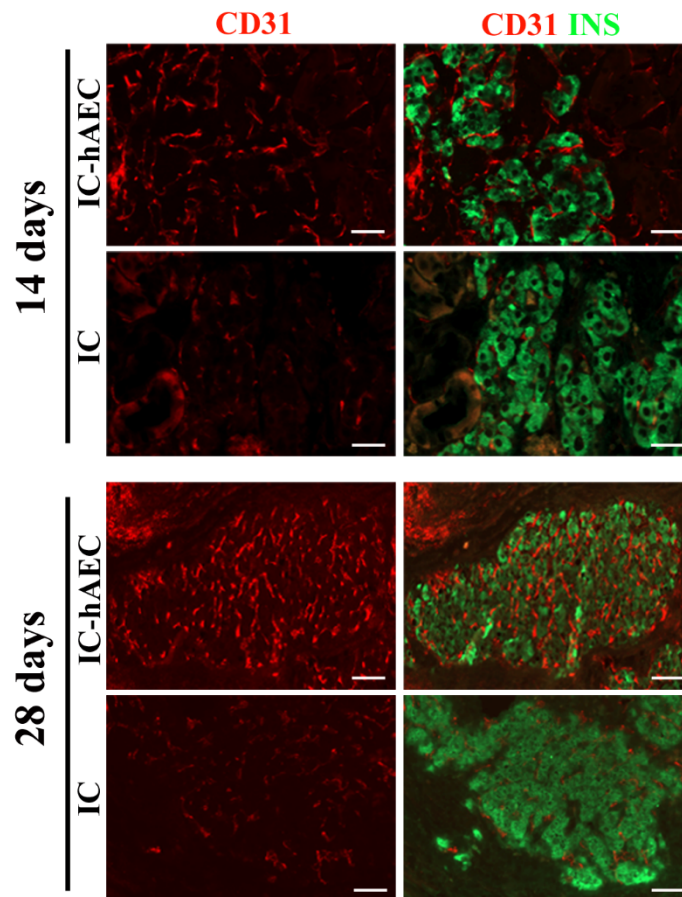

Supplementary Figure 2. Vascular density of the IC-hAEC grafts. IC grafts had noticeably less neovascularization compared to IC-hAEC organoids. The blood vessels of the graft site were detected on days 14 and 28 by CD31 immunostaining (red;  $n = 10$ ). Beta cells are stained for insulin (green). Scale bars: 20  $\mu$ m (14 days), 50  $\mu$ m (28days)

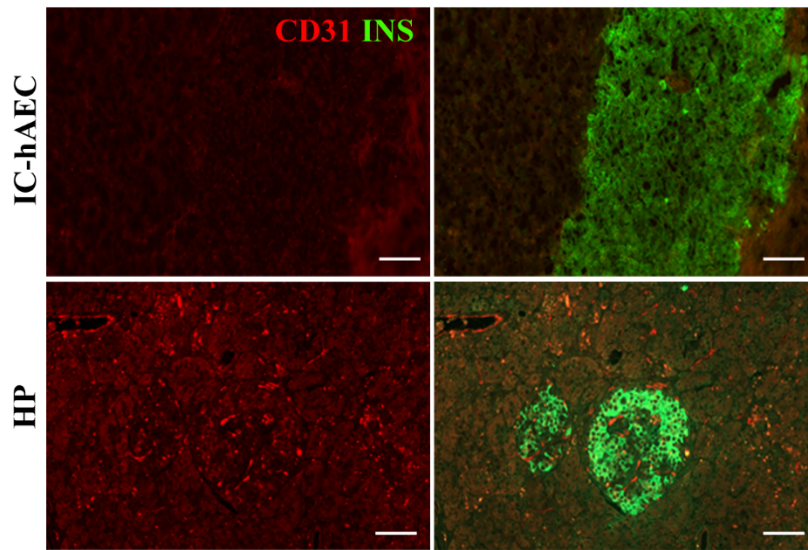

Supplementary Figure 3. Blood vessels were stained with human specific CD31(red) in IC-hAEC grafts and human pancreas (HP). Beta cells are stained for insulin (green). No human derived vessels were detected in the IC-hAEC grafts. Scale bars: 50  $\mu$ m

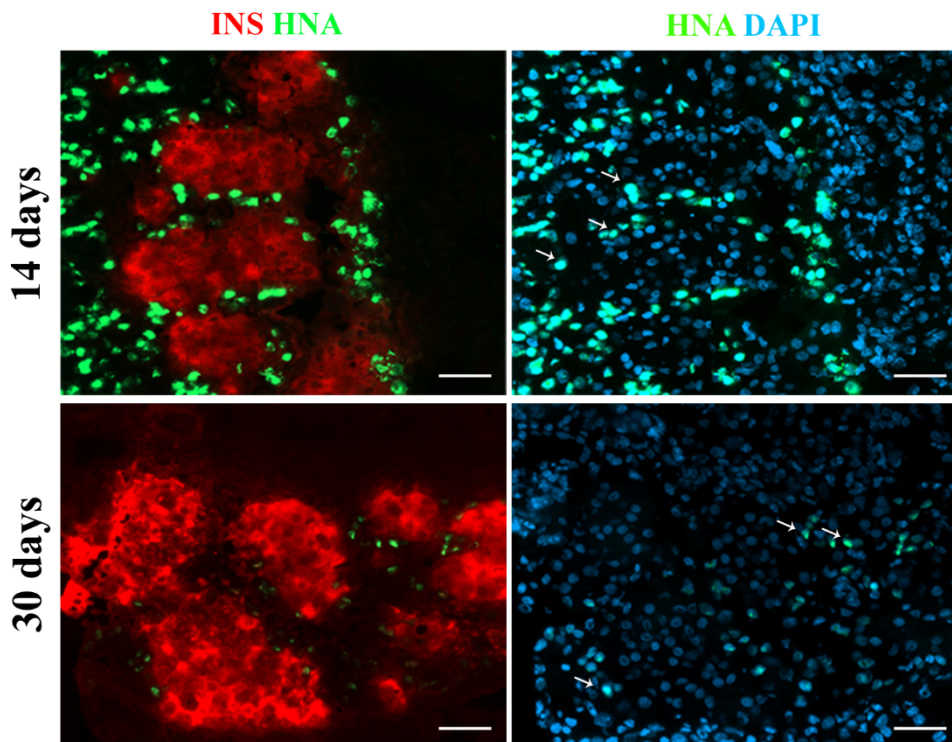

Supplementary Figure 4. hAECs are detectable up to 4 weeks after transplantation. hAECs were visualized at day 14 and 28 by using HNA staining (green). Beta cells are stained for insulin (red) and nuclei are stained with DAPI (blue). HNA-DAPI double positive nuclei are indicated by arrows. Scale bars: 20  $\mu$ m.

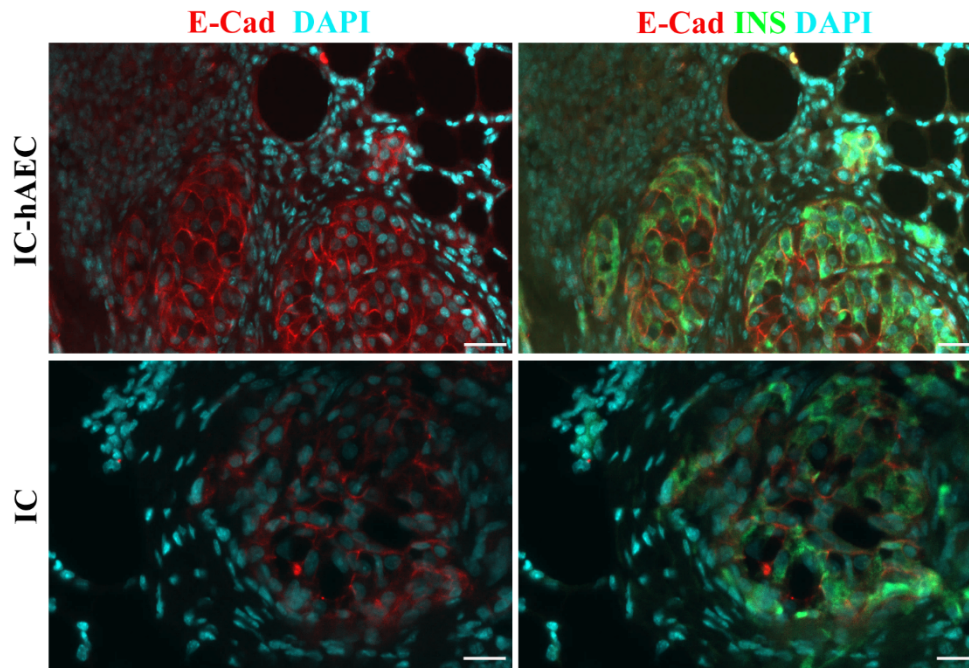

Supplementary Figure 5. Expression of E- cadherin by transplanted human-derived IC spheroids and IC-hAEC organoids into the epididymal fat pad, visualized by immunohistochemistry (red). E cadherin expression was considerably higher in the IC-hAEC group. Beta cells are stained for insulin (green) and nuclei are stained with DAPI (blue). Scale bars: 20  $\mu$ m

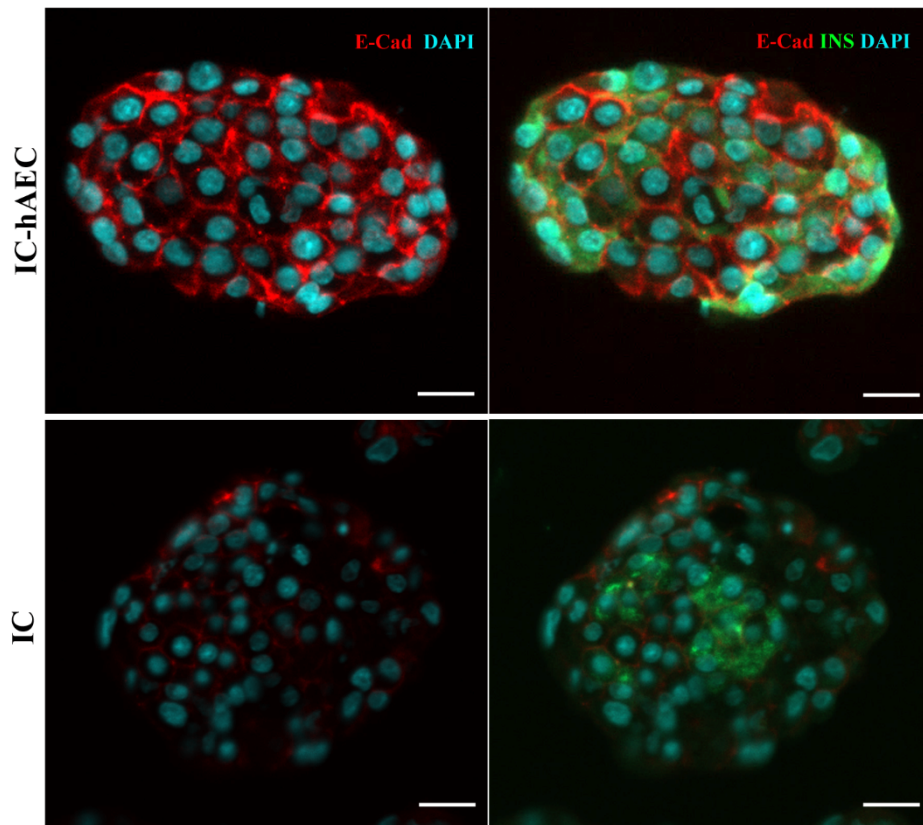

Supplementary Figure 6. In vitro expression of E-cadherin by IC spheroids and IC-hAEC organoids in hypoxic conditions, visualized by immunohistochemistry (red). E-cadherin expression was considerably higher in the IC-hAEC group. Beta cells are stained for insulin (green) and nuclei are stained with DAPI (blue). Scale bars: 20  $\mu\text{m}$



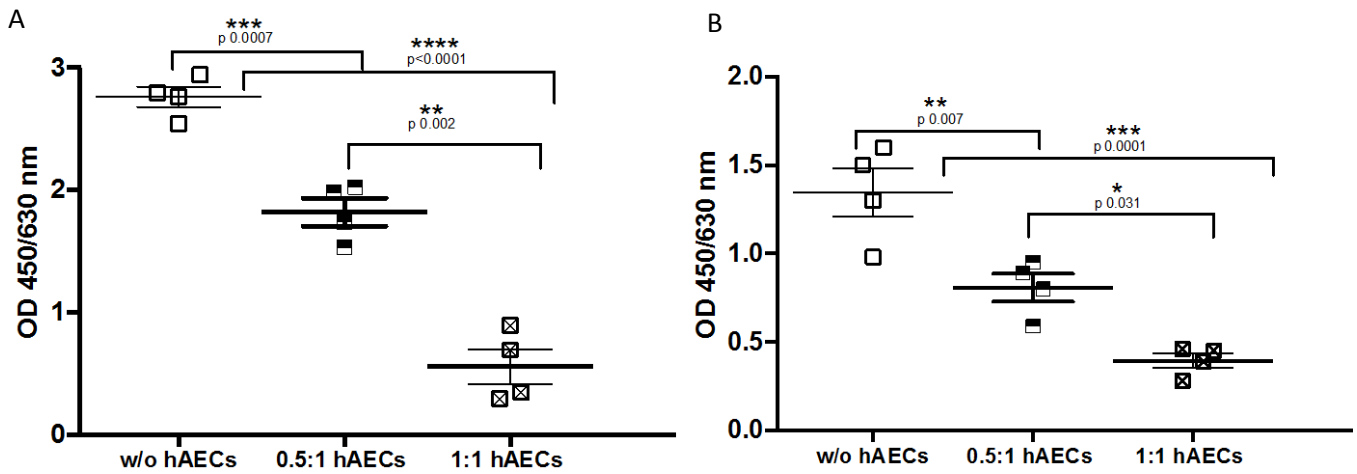

Supplementary Figure 7. hAECs exhibit immunomodulatory potential in MLR cultures. Human PBMCs were stimulated either by allogeneic PBMCs (A) or CD3/CD28 antibodies (B) in the presence or absence of third party hAECs. Lymphocyte proliferation was assessed by Bromo-deoxy-Uridine (BrdU) incorporation in enzyme-linked immunosorbent assays (ELISA). BrdU incorporation by responder PBMCs in the presence of allogeneic cells or mitogens was inhibited by hAECs in a dose-dependent manner. The results are expressed as net absorbance of the stimulated cells minus baseline (absorbance of unstimulated cells). All experiments were repeated with PBMCs from 2 different donors and hAECs derived from four different donors (passage 1). All experiments were done in triplicates. One-way ANOVA with Sidak's multiple comparisons test. Data are shown +/- SEM.

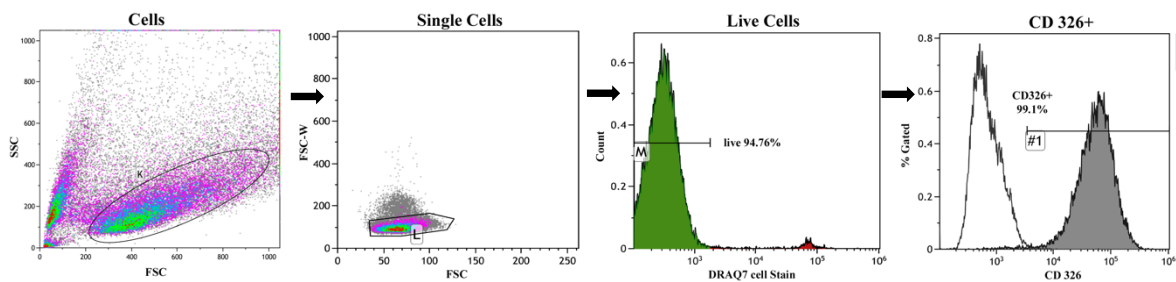

Supplementary Figure 8. Gating strategy used for flow cytometric analysis of single, live hAECs

Supplementary Table 1. Total insulin content ( $\mu\text{g/L}$ ) in IC spheroids and IC-hAEC organoids in normoxic and hypoxic conditions.

| <b>Normoxia</b> |                 | <b>Hypoxia</b> |                 |
|-----------------|-----------------|----------------|-----------------|
| <b>IC</b>       | <b>IC-hAECs</b> | <b>IC</b>      | <b>IC-hAECs</b> |
| 1141.933        | 1278.02         | 237.992        | 709.696         |
| 937.063         | 883.035         | 246.213        | 420.055         |
| 1289.248        | 1190.292        | 396.703        | 849.778         |
| 1563.326        | 1257.032        | 105.702        | 651.66          |
| 1365.236        | 1183.123        | 232.156        | 558.356         |

Supplementary Table 2. List of antibodies used for this study

| <b>Primary Antibodies</b>                        | <b>Company</b> | <b>Country</b> | <b>Product number</b> | <b>Application</b> | <b>Dilution</b>       |
|--------------------------------------------------|----------------|----------------|-----------------------|--------------------|-----------------------|
| PerCP-Cy 5.5 Mouse anti-SSEA-4                   | BD Biosciences | Switzerland    | 561565                | FC                 | 1:50                  |
| PE-Cy 7 Mouse anti-human CD90                    | BD Biosciences | Switzerland    | 561558                | FC                 | 1:100                 |
| FITC Mouse anti-human CD105                      | BD Biosciences | Switzerland    | 561443                | FC                 | 1:50                  |
| BV421 Mouse anti-human CD326                     | BD Biosciences | Switzerland    | 563180                | FC                 | 1:50                  |
| PE anti-human HLA-E                              | Biolegend      | UK             | 342604                | FC                 | 1:50                  |
| APC anti-human HLA-G                             | Biolegend      | UK             | 335910                | FC                 | 1:50                  |
| PE anti-human CD31                               | Biolegend      | UK             | 303106                | FC                 | 1:30                  |
| PerCP-Cy 5.5 anti-human CD45                     | Biolegend      | UK             | 368504                | FC                 | 1:25                  |
| Purified Mouse IgG1, κ Isotype Ctrl              | BD Biosciences | Switzerland    | 555746                | FC                 | 1:50                  |
| PerCP-Cy 5.5 Mouse IgG3, κ Isotype Ctrl          | BD Biosciences | Switzerland    | 561572                | FC                 | 1:50                  |
| PE-Cy 7 Mouse IgG1, κ Isotype Ctrl               | BD Biosciences | Switzerland    | 557872                | FC                 | 1:100                 |
| FITC Mouse IgG1, κ Isotype Ctrl                  | BD Biosciences | Switzerland    | 555748                | FC                 | 1:50                  |
| BV421 Mouse IgG1, κ Isotype Ctrl                 | BD Biosciences | Switzerland    | 562438                | FC                 | 1:50                  |
| PE Mouse IgG1, κ Isotype Ctrl                    | Biolegend      | UK             | 400112                | FC                 | 1:50                  |
| APC Mouse IgG2a, κ Isotype Ctrl                  | Biolegend      | UK             | 400222                | FC                 | 1:50                  |
| PerCP-Cy 5.5 Mouse IgG1                          | Biolegend      | UK             | 400150                | FC                 | 1:100                 |
| Purified rabbit anti-human CD34                  | Abcam          | UK             | ab81289               | FC, IF             | 1:50 (FC) 1:2500 (IF) |
| Rabbit polyclonal anti wide spectrum Cytokeratin | Abcam          | UK             | ab9377                | IF                 | 1:75                  |
| Rabbit polyclonal anti-Oct4                      | Abcam          | UK             | ab19857               | IF                 | 1:200                 |



|                                       |                            |                  |                       |                    |                 |
|---------------------------------------|----------------------------|------------------|-----------------------|--------------------|-----------------|
| Mouse Anti-Ecadherin                  | Cell Signalling Technology | Maryland (USA)   | 14472S                | IF                 | 1:50            |
| Mouse anti-human nuclear antigen      | Lifespan Biosciences       | Washington (USA) | LS-C357989            | IF                 | 1:200           |
| Rabbit polyclonal anti HIF-1 alpha    | Abcam                      | UK               | ab2185                | IF                 | 1:100           |
| GuineaPig anti-insulin                | DakoCytomation             | Switzerland      | A0564                 | IF                 | 1:100           |
| Mouse anti-glucagon                   | Sigma Aldrich              | Switzerland      | G2654                 | IF                 | 1:4000          |
| Rabbit anti-Somatostatin              | DakoCytomation             | Switzerland      | A0566                 | IF                 | 1:100           |
| Rabbit anti mouse CD31                | Abcam                      | UK               | Ab28364               | IF                 | 1:50            |
| Mouse anti-human CD31                 | DakoCytomation             | Switzerland      | M0823                 | IF                 | 1:50            |
| Mouse Anti-E-cadherin                 | Cell Signalling Technology | Maryland (USA)   | 14472S                | IF                 | 1:50            |
| rabbit anti-human VEGF                | Abcam                      | UK               | Ab52917               | IF                 | 1:200           |
| Rabbit anti-Laminin                   | Sigma Aldrich              | Switzerland      | L9393                 | IF                 | 1:30            |
| Rabbit anti Human Collagen IV         | Bio-Rad                    | Switzerland      | 2150-0140             | IF                 | 1:30            |
| <b>Secondary Antibodies</b>           | <b>Company</b>             | <b>Country</b>   | <b>Product number</b> | <b>Application</b> | <b>Dilution</b> |
| AlexaFluor 488 goat anti-mouse IgG    | ThermoFisher Scientific    | Switzerland      | A11001                | IF                 | 1:300           |
| AlexaFluor 488 goat anti-rabbit IgG   | ThermoFisher Scientific    | Switzerland      | A11008                | IF                 | 1:300           |
| AlexaFluor 555 donkey anti-rabbit IgG | ThermoFisher Scientific    | Switzerland      | A31572                | IF                 | 1:300           |
| AlexaFluor 555 donkey anti-mouse IgG  | ThermoFisher Scientific    | Switzerland      | A31570                | IF                 | 1:300           |
| Goat anti GuineaPig Fluorescein IgG   | Jackson Laboratories       | Switzerland      | 106-095-003           | IF                 | 1:200           |
| FITC Goat Anti-Mouse IgG/IgM          | BD Biosciences             | Switzerland      | 555988                | FC                 | 1:100           |

Supplementary Table 3. List of ELISA kits used for this study

| Product                        | Company  | Country | Product number |
|--------------------------------|----------|---------|----------------|
| Rat insulin ELISA kit          | Mercodia | Sweden  | 10-1250-01     |
| Insulin ELISA kit              | Mercodia | Sweden  | 10-1113-01     |
| rat C-peptide ELISA            | Mercodia | Sweden  | 10-1172-01     |
| Ultrasensitive C-peptide ELISA | Mercodia | Sweden  | 10-1141-01     |

Supplementary Table 4. RT qPCR reagents

| Product                                      | Company                 | Country     | Product number |
|----------------------------------------------|-------------------------|-------------|----------------|
| Rneasy minikit                               | Qiagen                  | France      | 74104          |
| High Capacity cDNA Reverse transcription kit | ThermoFisher Scientific | Switzerland | 4368814        |
| TaqMan Fast Advance Master Mix               | ThermoFisher Scientific | Switzerland | 4444557        |
| Takyon No-Rox SYBR Core Kit blue dTTP        | Takyon                  | Belgium     | UF-NSCT-B0201  |

| Gene      | Forward Primer                  | Reverse Primer                     | Amplification method |
|-----------|---------------------------------|------------------------------------|----------------------|
| Rat ACTB  |                                 | Rn00667869-m1                      | Taqman               |
| Rat INS2  |                                 | Rn01774648-g1                      | Taqman               |
| Rat BCL2  |                                 | Rn99999125-m1                      | Taqman               |
| Rat CASP3 |                                 | Rn00563902-m1                      | Taqman               |
| Rat CASP8 |                                 | Rn00574069-m1                      | Taqman               |
| Rat CASP9 |                                 | Rn00581212-m1                      | Taqman               |
| Rat RPLP1 | TCT CTG AGC TTG CCT GCA TCT ACT | CCT ACA TTG CAG ATG AGG CTT<br>CCA | SYBR                 |
| Rat VEGF  | AAC GCG AGT CTG TGT TTT TGC     | AGC GGA GAA AGC ATT TGT TTG        | SYBR                 |

Supplementary Table 5. Media and reagents

| <b>Product</b>                                   | <b>Company</b>          | <b>Country</b> | <b>Product number</b> |
|--------------------------------------------------|-------------------------|----------------|-----------------------|
| DMEM/F-12                                        | ThermoFisher Scientific | Switzerland    | 21041-25              |
| MEM NEAA 100X                                    | ThermoFisher Scientific | Switzerland    | 11140-035             |
| HBSS                                             | ThermoFisher Scientific | Switzerland    | 14175-053             |
| Dulbecco's Phosphate Buffer Saline (dPBS)        | Sigma Aldrich           | Switzerland    | D8537                 |
| Fetal bovine serum (FBS)                         | Merk Millipore          | Switzerland    | s0115                 |
| Bovine Serum Albumine (BSA)                      | Sigma Aldrich           | Switzerland    | A3733                 |
| human recombinant epidermal growth factor (hEGF) | Sigma Aldrich           | Switzerland    | E9644                 |
| Sodium Pyruvate                                  | Sigma Aldrich           | Switzerland    | s8636                 |
| L-Glutamin-Penicillin-Streptomycin 10X           | Sigma Aldrich           | Switzerland    | G1146                 |
| Fungin                                           | Invivogen               | USA            | ant-fn-2              |
| 2-mercaptoethanol                                | ThermoFisher Scientific | Switzerland    | 21985-023             |
| collagenase V                                    | Sigma Aldrich           | Switzerland    | C9263-5G              |
| StemPro® Accutase®                               | ThermoFisher Scientific | Switzerland    | A11105-01             |
| 0.05% (w/v) trypsin-EDTA                         | ThermoFisher Scientific | Switzerland    | 25300-054             |
| CM-DiI                                           | ThermoFisher Scientific | Switzerland    | C7000                 |
| CM-DiO                                           | ThermoFisher Scientific | Switzerland    | V22886                |
| Draq7                                            | Biostatus               | Shepshed UK    | DR71000               |
